# Supplementary material for: Ultrahigh energy density of poly(vinylidene fluoride) from synergistically improved dielectric constant and withstand voltage by tuning the crystallization behavior
Source: Royal Society of Chemistry journal article supplement (doi:10.1039/d1ta07680a), 2021-01-01
Supplement: d1ta07680a1.pdf [file d1ta07680a1.pdf]

## Supporting Information

### **Ultrahigh Energy Density of Poly(vinylidene fluoride) from Synergistically Improved Dielectric Constant and Withstand Voltage by Tuning Crystallization Behavior**

*Ru Guo, Hang Luo\*, Xuefan Zhou, Zhida Xiao, Haoran Xie, Yuan Liu, Kechao Zhou, Zhonghui Shen\*, Longqing Chen, Dou Zhang\**

R. Guo, Dr. H. Luo, X. F. Zhou, Z. D. Xiao, H. R. Xie, Y. Liu, Prof. K. C. Zhou, Prof. D. Zhang

State Key Laboratory of Powder Metallurgy, Central South University,  
Changsha 410083, Hunan Province, P. R. China

E-mail: [hangluo@csu.edu.cn](mailto:hangluo@csu.edu.cn) (H. Luo); [dzhang@csu.edu.cn](mailto:dzhang@csu.edu.cn) (D. Zhang)

Prof. Z. H. Shen

State Key Laboratory of Advanced Technology for Materials Synthesis and Processing,  
Center of Smart Materials and Devices, Wuhan University of Technology,  
Wuhan 430070, Hubei Province, P. R. China

E-mail: [zhshen@whut.edu.cn](mailto:zhshen@whut.edu.cn) (Z. H. Shen)

Prof. L. Q. Chen

Department of Materials Science and Engineering, The Pennsylvania State University,  
University Park, Pennsylvania 16802, United States

**Keywords:** PVDF, Energy storage, Uniaxial stretching, Structure-property relationships, Crystallization behavior

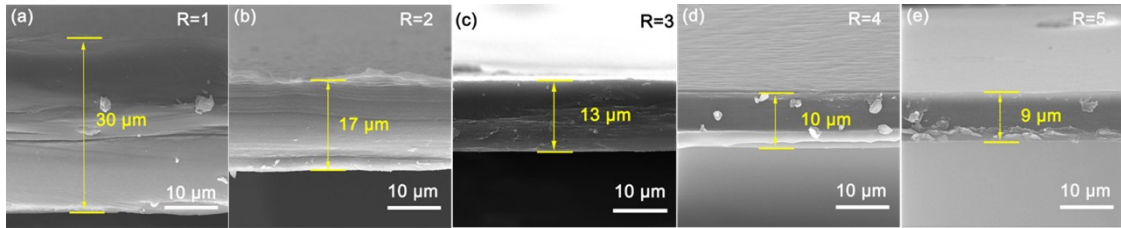

**Figure S1.** Cross section SEM image of PVDF films with different stretch ratio.

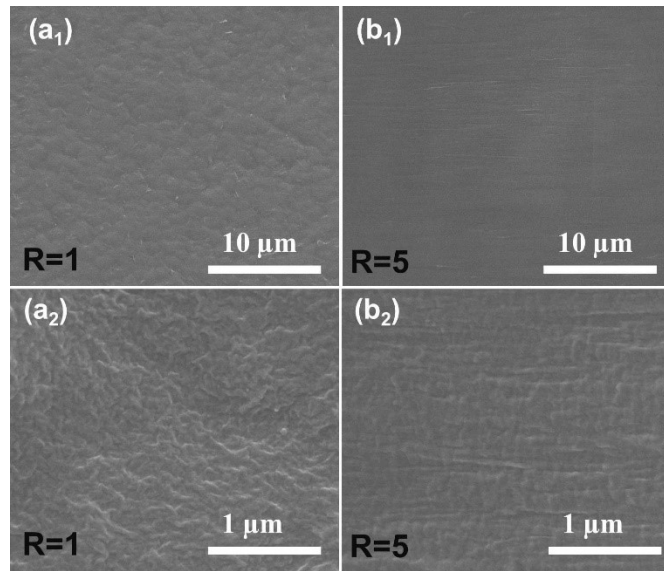

**Figure S2.** The surface (a<sub>1</sub>, b<sub>1</sub>) and cross-section (a<sub>2</sub>, b<sub>2</sub>) SEM image of R=1 and R=5 PVDF film, respectively.

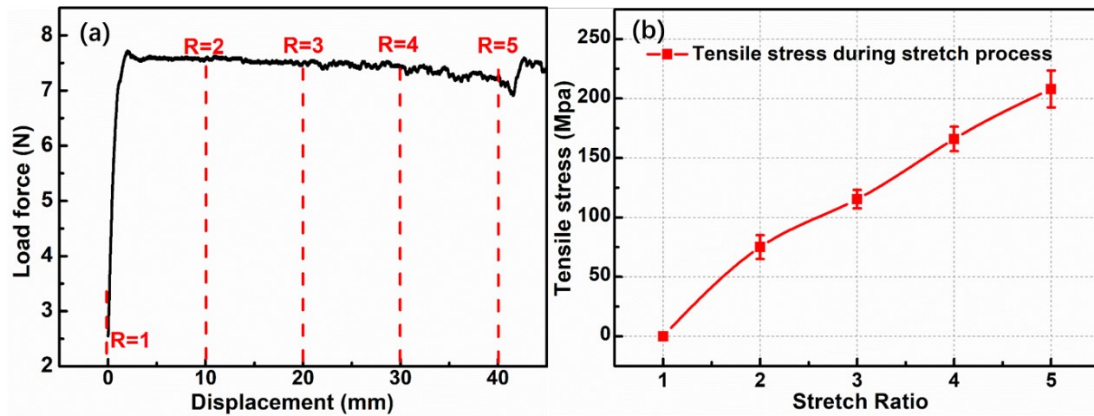

**Figure S3.** (a) Load force–Displacement curve for PVDF films by uniaxially stretch. (b) The variation of true tensile stress with the increase of drawing ratio, calculated by load divided the cross-sectional area of stretched PVDF films. The increasing tensile stress during uniaxial stretching characterized by the universal mechanical testing machine provide a driving force for the structural changes (phase transformation, orientation enhancement and crystallinity reduction) of PVDF films.

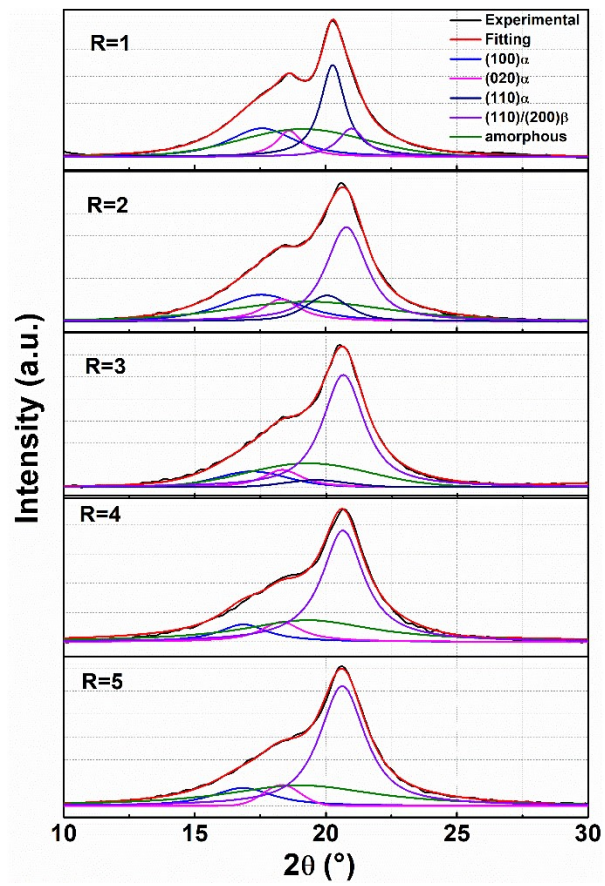

**Figure S4.** Peak fitting results of 1D WAXD profiles for the PVDF films with different stretch ratio.

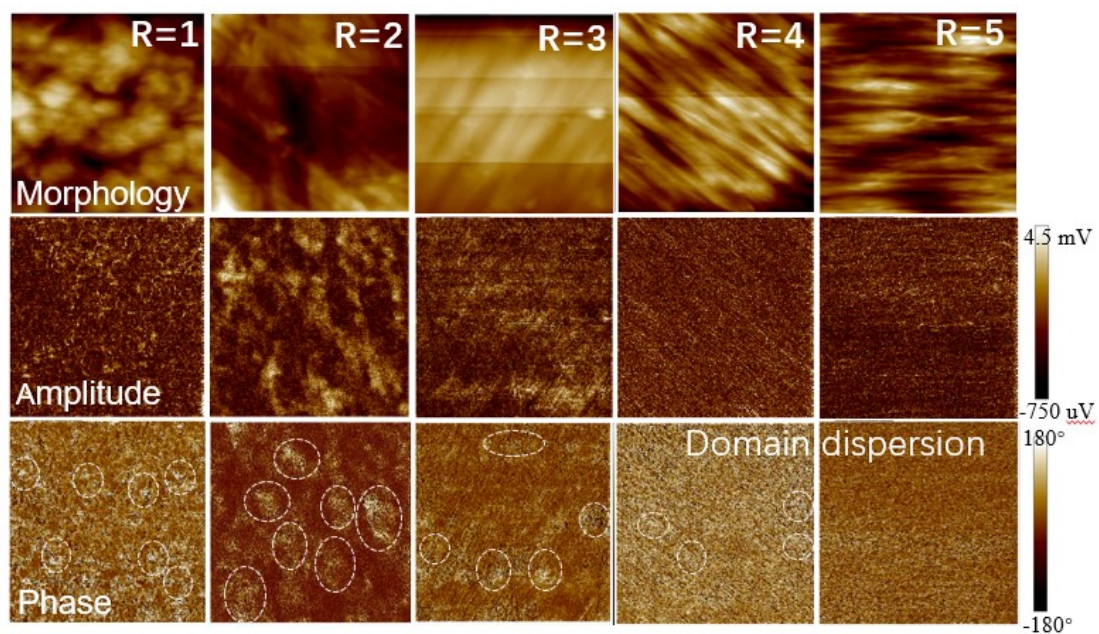

**Figure S5.** PFM graph morphology, amplitude and phase response of the uniaxially stretched PVDF films with scanning area of  $10 \times 10 \mu\text{m}^2$ .

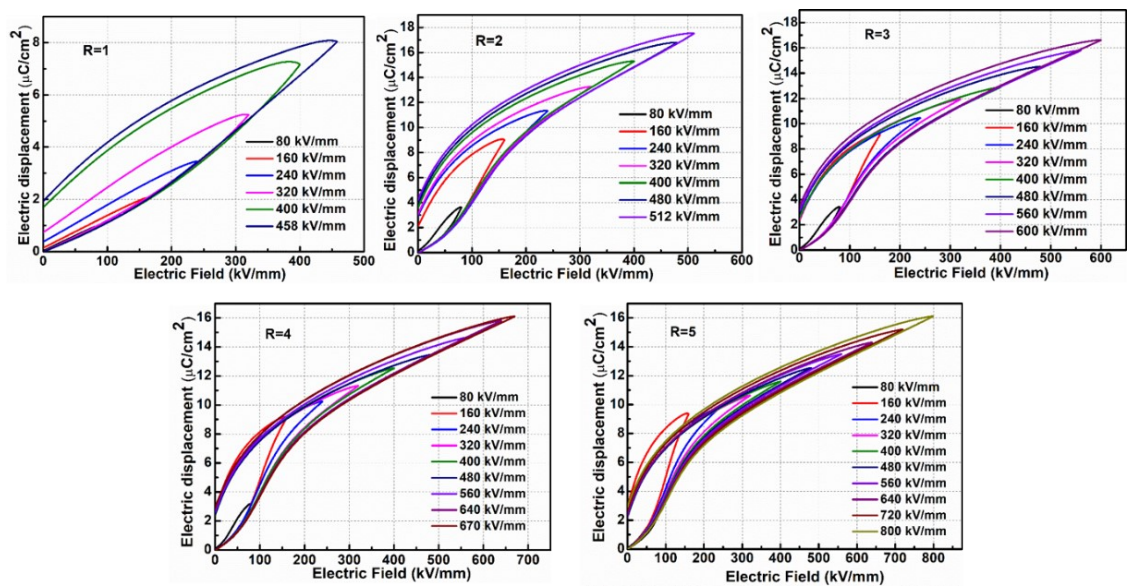

**Figure S6.** The Electric displacement - Electric field (D-E) loops for PVDF polymer with different stretched PVDF films.

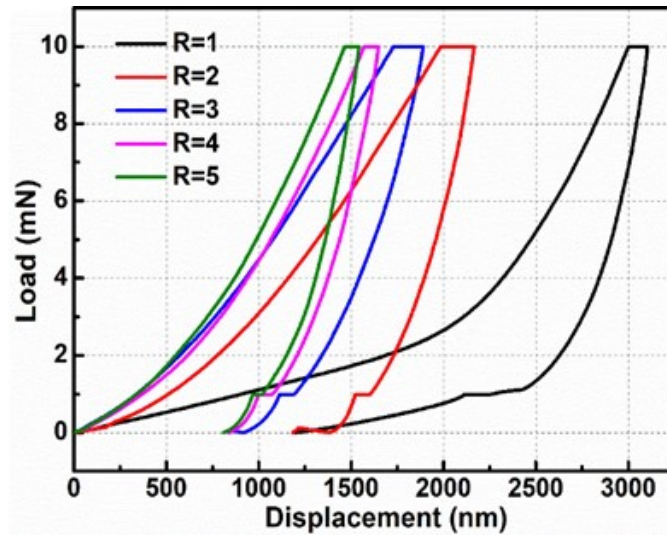

**Figure S7.** The load-displacement curves for PVDF polymer with different stretched PVDF films by nanoindentation test to characterize out-of-plane mechanical behaviors.

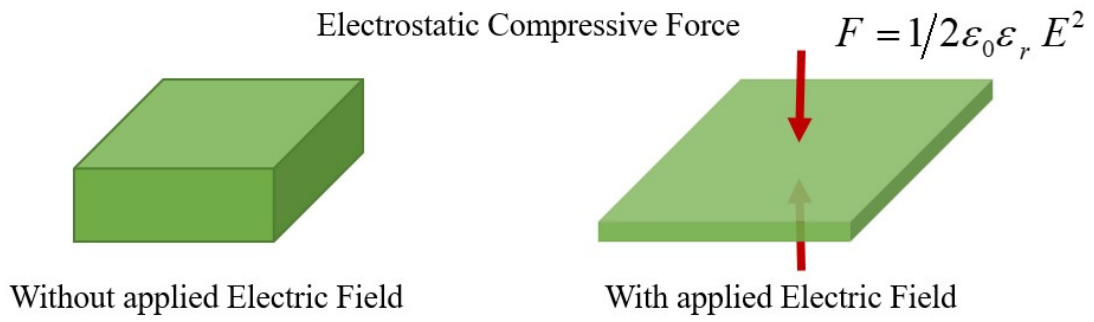

**Figure S8.** Schematic diagram of electrostatic compressive force produced by applying electric field for dielectric PVDF films.
